# Supplementary material for: Potential bioavailability of organic matter from atmospheric particles to marine heterotrophic bacteria
Source: Copernicus journal article supplement (doi:10.5194/bg-17-6271-2020), 2020-12-14
Supplement: Supplementary file 1 [file bg-17-6271-2020-supplement.pdf]

Supplement of Biogeosciences, 17, 6271–6285, 2020  
<https://doi.org/10.5194/bg-17-6271-2020-supplement>  
© Author(s) 2020. This work is distributed under  
the Creative Commons Attribution 4.0 License.

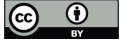

*Supplement of*

## **Potential bioavailability of organic matter from atmospheric particles to marine heterotrophic bacteria**

**Kahina Djaoudi et al.**

*Correspondence to:* Kahina Djaoudi (kdjaoudi@email.arizona.edu)

The copyright of individual parts of the supplement might differ from the CC BY 4.0 License.

**Table S1. Summary of the subsampling selected times for bacterial abundance (BA), bacterial production (BP), ectoenzymatic activities (EEA; aminopeptidase, B-glucosidase and lipase), dissolved organic carbon (DOC), dissolved organic nitrogen (DON) and dissolved organic phosphate (DOP).**

| Incubation period; d | AB | BP | EEA | DOC | DON | DOP |
|----------------------|----|----|-----|-----|-----|-----|
| *T0                  | x  | x  | x   | x   | x   | x   |
| T=1.7                | x  | x  |     |     |     |     |
| T=2.7                | x  | x  |     |     |     |     |
| T=3.7                | x  | x  |     |     |     |     |
| T=4.7                | x  | x  |     |     |     |     |
| T=5.7                | x  | x  | x   | x   | x   | x   |
| T=6.7                | x  | x  |     |     |     |     |
| T=7.7                | x  | x  |     |     |     |     |
| T=8.7                | x  | x  |     |     |     |     |
| T=11.7               | x  | x  |     |     |     |     |
| T=13.7               | x  | x  |     |     |     |     |
| T=15.7               | x  | x  | x   | x   | x   | x   |

\*The sampling at T0 was performed 1 hour after anthropogenic, Saharan dust aerosols and glucose additions.

**Table S2. Elemental C:N:P ratios in the amended treatments and in the control, over the incubation period.**

|                         | Glucose    | Saharan Dust aerosol | Anthropogenic Aerosol | Control   |
|-------------------------|------------|----------------------|-----------------------|-----------|
| Incubation period; days | DOC:DON    |                      |                       |           |
| 0                       | 23 ± 3     | 9 ± 0.4              | 9                     | 8 ± 0.5   |
| 5.7                     | 10 ± 3     | 9 ± 2                | 6.5                   | 10 ± 5    |
| 15.7                    | 6 ± 2      | 8 ± 6                | 5                     | 8 ± 1     |
|                         | DOC:DOP    |                      |                       |           |
| 0                       | 1667 ± 790 | 1657 ± 446           | 781                   | -         |
| 5.7                     | 255 ± 104  | 606 ± 251            | 872                   | 677 ± 300 |
| 15.7                    | -          | -                    | -                     | -         |
|                         | DON:DOP    |                      |                       |           |
| 0                       | 79 ± 39    | 181 ± 51             | 106                   | -         |
| 5.7                     | 25 ± 3     | 76 ± 44              | 136                   | 84 ± 23   |
| 15.7                    | -          | -                    | -                     | -         |

(-) DOP values were below the detection limit of the conventional automated procedure

### Panel A

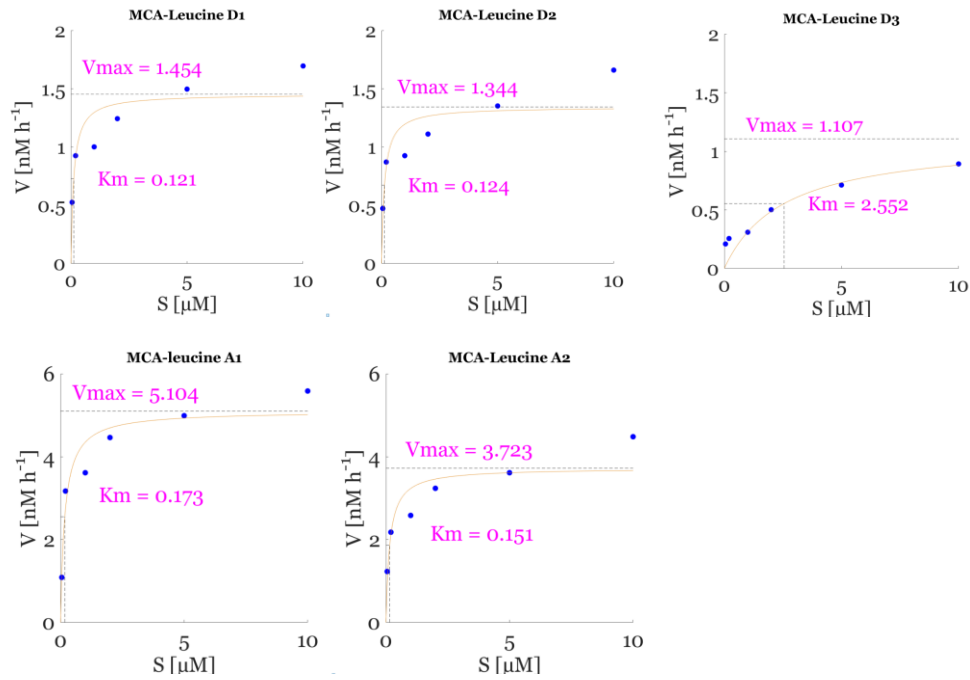

### Panel B

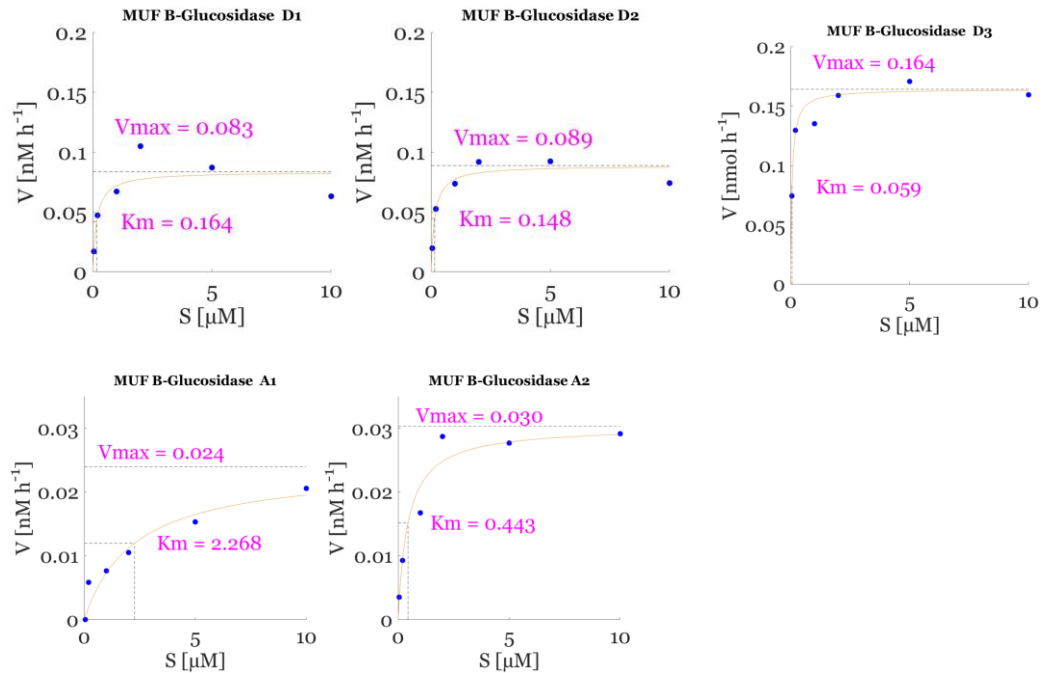

Figure S1. Amino-peptidase (MCA-leucine; panel A), B-glucosidase (MUF B-glucosidase; panel B) and lipase (MUF-palmitate; Panel C) activities in the anthropogenic and Saharan dust (D) amended treatment at the end of the incubation period (t=15.7 days). D1, D2 and D2 refer to the triplicate of the Sharan dust treatment while A1 and A2 reflect those of the anthropogenic aerosol treatment. V<sub>max</sub> and K<sub>m</sub> refer to the maximum hydrolysis rate and to the Michalis Menten constant, respectively.
